# Supplementary material
Source: PubMed Central journal article supplement (PMC5797986)
Supplement: NIHMS937479-supplement-supplement_1.pdf [file NIHMS937479-supplement-supplement_1.pdf]

Full Panel of Proteins from Angiogenesis Profiler Array  
 DPSC-FBS vs. DPSC-HS

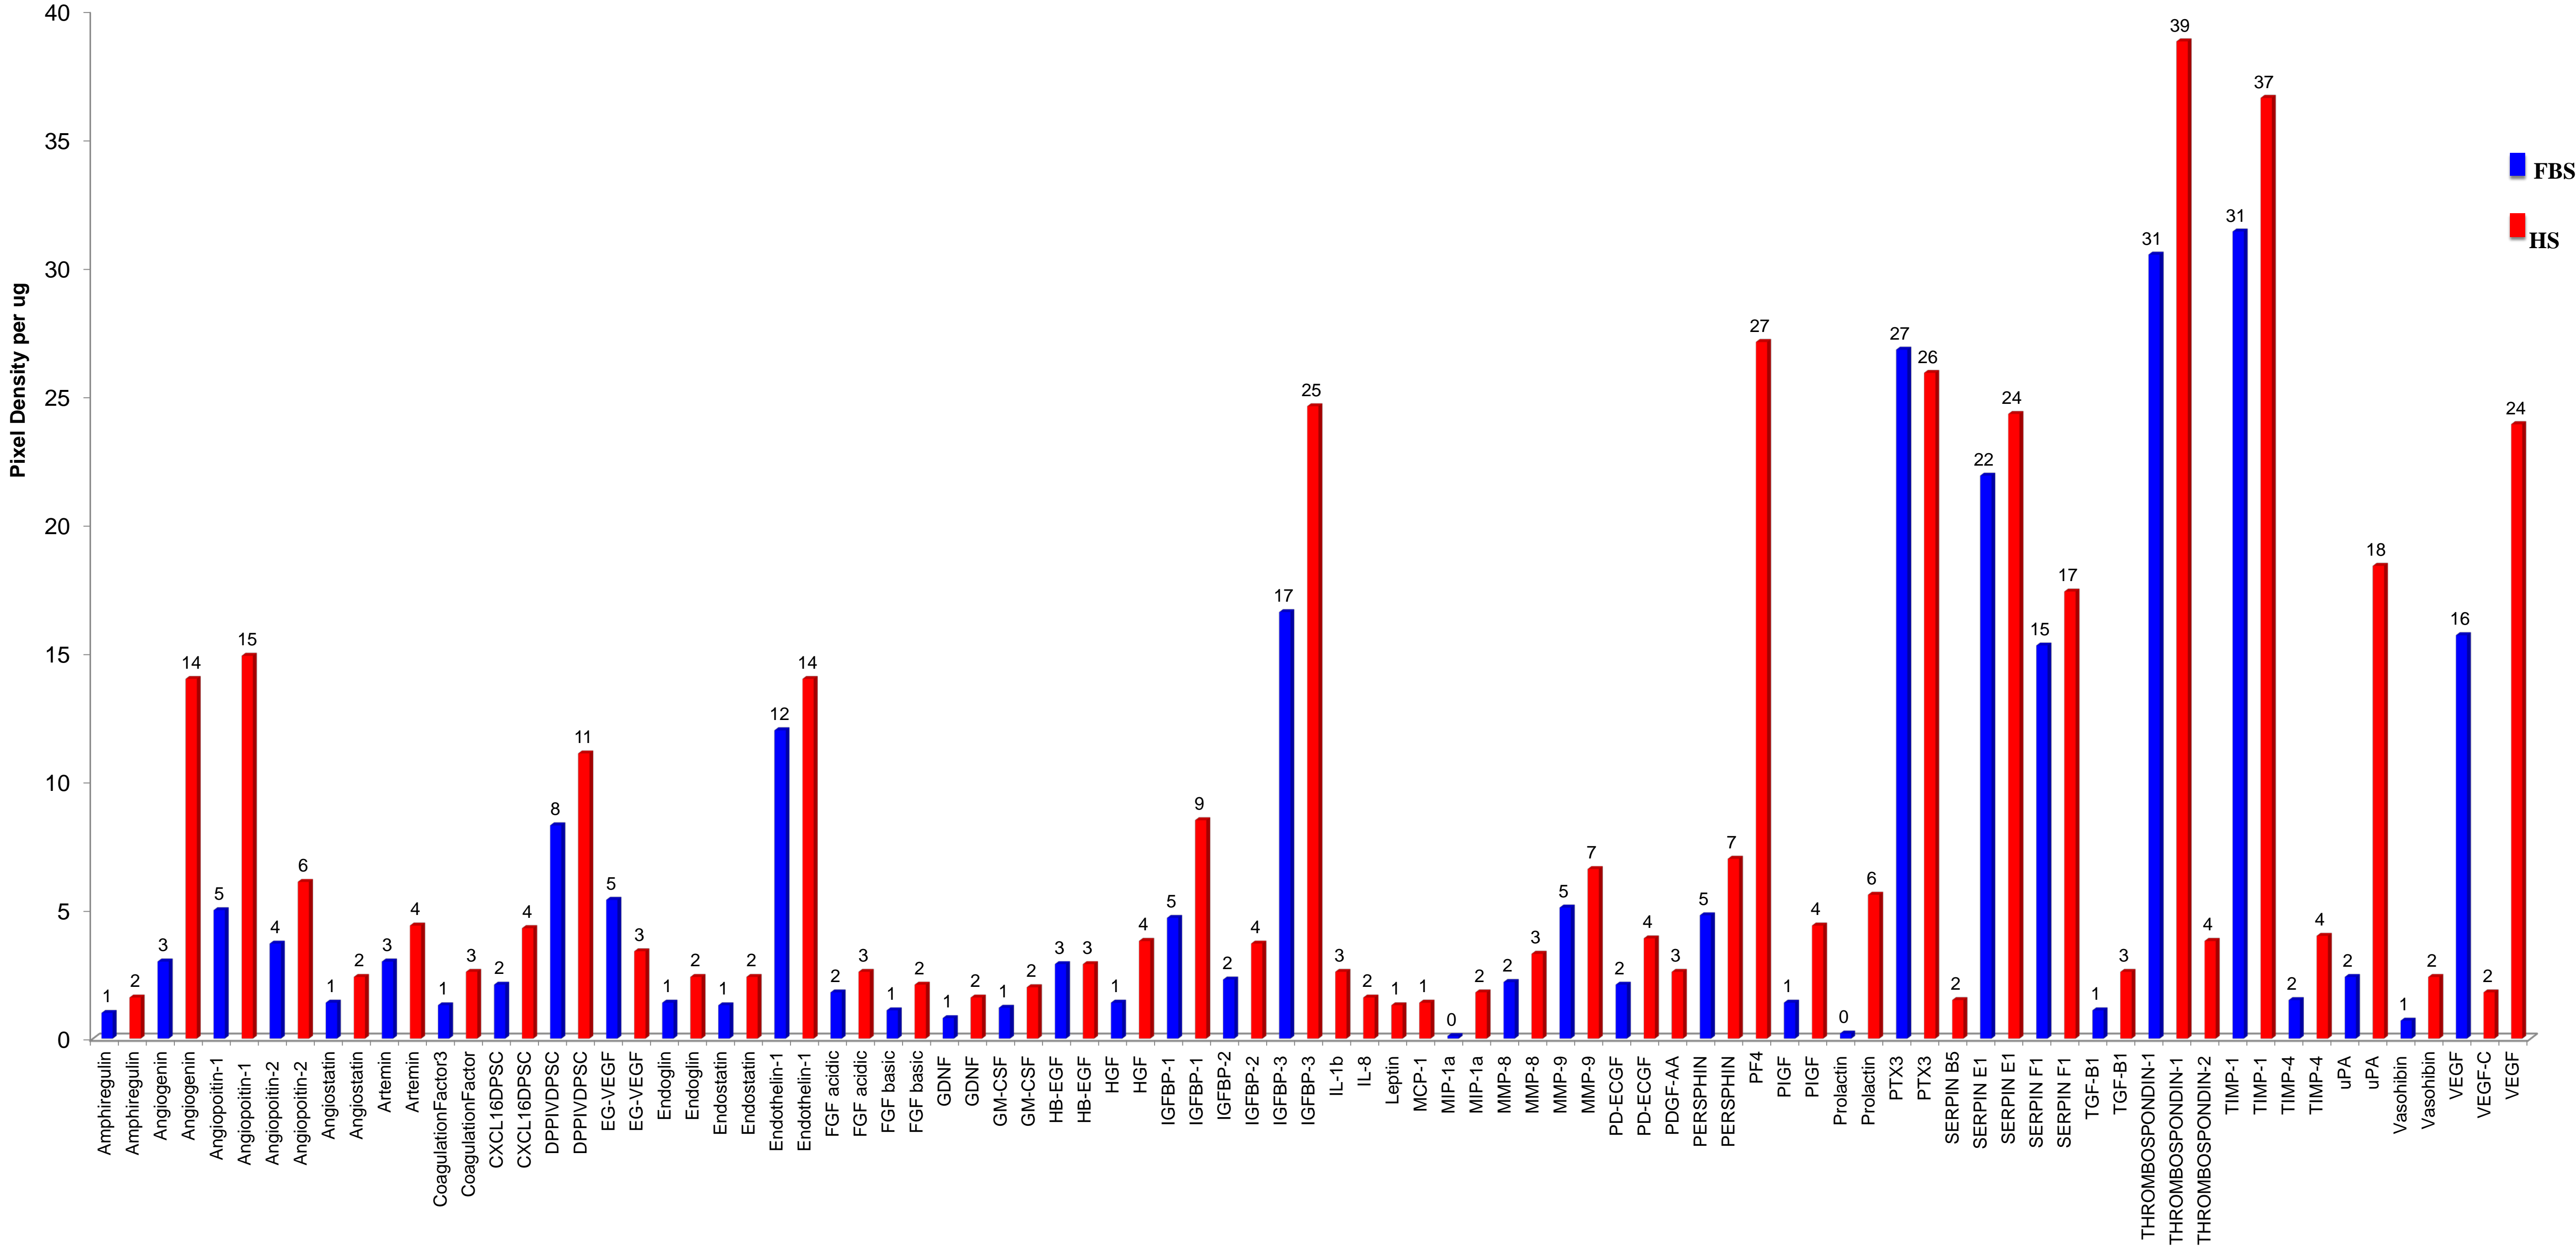

Supplementary Data- Figure 1. Angiogenesis Profiler Complete Array
